# Supplementary material for: Nutritional and Functional Advantages of the Use of Fermented Black Chickpea Flour for Semolina-Pasta Fortification
Source: PubMed Central journal article supplement (PMC7831118; doi:10.3390/foods10010182), 2021-01-18
Supplement: foods-10-00182-s001.pdf [file foods-10-00182-s001.pdf]

## Supplementary material - Nutritional and Functional Advantages of the Use of Fermented Black Chickpea Flour for Semolina-Pasta Fortification.

Ilaria De Pasquale, Michela Verni, Vito Verardo, Ana María Gómez-Caravaca and Carlo Giuseppe Rizzello

Table 1. Drying cycle used for making pasta.

| Cycle | Ventilation      |        |            | Recovery         |        |            |
|-------|------------------|--------|------------|------------------|--------|------------|
|       | Temperature (°C) | U.R. % | Time (min) | Temperature (°C) | U.R. % | Time (min) |
| 1     | 55               | 85     | 3          | 55               | 85     | 2          |
| 2     | 55               | 85     | 3          | 55               | 85     | 2          |
| 3     | 55               | 70     | 3          | 55               | 70     | 4          |
| 4     | 55               | 70     | 3          | 40               | 65     | 8          |
| 5     | 55               | 70     | 3          | 40               | 60     | 10         |
| 6     | 55               | 70     | 3          | 40               | 60     | 10         |
| 7     | 55               | 70     | 3          | 40               | 55     | 10         |
| 8     | 55               | 70     | 3          | 40               | 55     | 12         |
| 9     | 55               | 70     | 3          | 40               | 55     | 12         |
| 10    | 55               | 70     | 3          | 40               | 55     | 12         |
| 11    | 55               | 70     | 3          | 40               | 55     | 12         |
| 12    | 55               | 70     | 3          | 40               | 55     | 14         |
| 13    | 55               | 70     | 3          | 40               | 50     | 14         |
| 14    | 55               | 70     | 3          | 40               | 50     | 16         |
| 15    | 55               | 70     | 3          | 40               | 50     | 16         |
| 16    | 55               | 70     | 3          | 40               | 50     | 16         |
| 17    | 55               | 65     | 3          | 40               | 50     | 16         |
| 18    | 55               | 65     | 3          | 40               | 50     | 18         |
| 19    | 55               | 65     | 3          | 40               | 50     | 18         |
| 20    | 55               | 65     | 3          | 40               | 45     | 18         |
| 21    | 55               | 65     | 3          | 40               | 45     | 18         |
| 22    | 55               | 60     | 3          | 35               | 45     | 18         |
| 23    | 55               | 60     | 3          | 35               | 45     | 18         |
| 24    | 50               | 55     | 3          | 35               | 45     | 18         |
| 25    | 45               | 55     | 3          | 35               | 15     | 18         |
| 26    | 40               | 40     | 3          | 15               | 15     | 10         |
| 27    | 15               | 10     | 20         | 15               | 10     | 20         |
| 28    | 15               | 10     | 20         | 15               | 10     | 20         |

**Table 2.** List and definition of the attributes used for the sensory analysis made on pasta samples.

| <b>Attribute</b>             | <b>Abbreviation</b> | <b>Definition</b>                                                                                    |
|------------------------------|---------------------|------------------------------------------------------------------------------------------------------|
|                              |                     | <i>Visual</i>                                                                                        |
| Color heterogeneity          | Ht                  | Heterogeneity of the pasta color evaluated after cooking                                             |
| Texture                      | Te                  | Uniformity of the pasta texture at visual inspection                                                 |
| Stacking                     | St                  | The degree of piece to piece adhesion                                                                |
|                              |                     | <i>Odor</i>                                                                                          |
| Intensity                    | OI                  | Overall odor intensity of pasta                                                                      |
| Pungent                      | OP                  | Pungency of pasta smell                                                                              |
|                              |                     | <i>Flavour</i>                                                                                       |
| Pungent                      | P                   | Pungency of pasta flavour                                                                            |
| Delicate                     | D                   | Soft and delicate flavor perception                                                                  |
| Legume                       | L                   | Typical flavor of lentils, beans, chickpeas, etc.                                                    |
| Whole                        | W                   | Flavor of whole-wheat flour, buckwheat                                                               |
| Toasted                      | To                  | Grilled and toasty flavor                                                                            |
| Sapidity                     | Sp                  | Sapidity taste                                                                                       |
|                              |                     | <i>Texture</i>                                                                                       |
| Chewability                  | Ch                  | The mouthfeel sensation of labored mastication due to sustained, elastic resistance from the sample. |
| <i>General acceptability</i> | GA                  | Overall appreciation                                                                                 |

**Table 3.** Polar compounds identified in free and bound extracts of black chickpea doughs by UPLC-PDA-ESI-QTOF.

| No.                            | Polar compound                                      | RT (min) | Molecular Formula                                            | m/z expected | m/z calculated | Error (ppm) | Score (%) | Fragments (MS <sup>2</sup> ) |
|--------------------------------|-----------------------------------------------------|----------|--------------------------------------------------------------|--------------|----------------|-------------|-----------|------------------------------|
| <i>Free phenolic compounds</i> |                                                     |          |                                                              |              |                |             |           |                              |
| 1                              | Protocatechuic acid                                 | 1.125    | C <sub>7</sub> H <sub>6</sub> O <sub>4</sub>                 | 153.0198     | 153.0188       | 6.5         | 100       |                              |
| 2                              | Dihydroxybenzoic acid hexoside                      | 2.652    | C <sub>13</sub> H <sub>16</sub> O <sub>9</sub>               | 315.0719     | 315.0716       | 1           | 96.95     | 217.0164, 152.0088, 108.0225 |
| 3                              | Dihydrocaffeic acid                                 | 2.921    | C <sub>9</sub> H <sub>10</sub> O <sub>4</sub>                | 181.0512     | 181.0501       | 6.1         | 92.63     |                              |
| 4                              | Indole-3-acrylic acid                               | 3.376    | C <sub>11</sub> H <sub>9</sub> N <sub>1</sub> O <sub>2</sub> | 186.0568     | 186.0555       | 7           | 89.47     | 142.0665                     |
| 5                              | Hydroxybenzoic acid hexoside-pentoside              | 3.521    | C <sub>18</sub> H <sub>24</sub> O <sub>12</sub>              | 431.1194     | 431.119        | 0.9         | 99.95     | 137.0245                     |
| 6                              | Dihydroxybenzoic acid hexoside-pentoside I          | 4.030    | C <sub>18</sub> H <sub>24</sub> O <sub>13</sub>              | 447.1144     | 447.1139       | 1.1         | 96.67     | 131.0708                     |
| 7                              | Dihydroxybenzoic acid hexoside-pentoside II         | 4.336    | C <sub>18</sub> H <sub>24</sub> O <sub>13</sub>              | 447.1144     | 447.1139       | 1.1         | 96.67     | 131.0708                     |
| 8                              | Dihydrophaseic acid                                 | 4.518    | C <sub>15</sub> H <sub>22</sub> O <sub>5</sub>               | 281.1394     | 281.1389       | 1.8         | 96.55     | 217.004                      |
| 9                              | Phloretic acid                                      | 5.54     | C <sub>9</sub> H <sub>10</sub> O <sub>3</sub>                | 165.0564     | 165.0552       | 7.3         | 62.13     |                              |
| 10                             | Dihydrophaseic acid isomer                          | 6.165    | C <sub>15</sub> H <sub>22</sub> O <sub>5</sub>               | 281.1394     | 281.1389       | 1.8         | 96.55     | 217.0029                     |
| 11                             | Hydroxybenzoic acid hexoside-pentoside dehydrodimer | 6.634    | C <sub>36</sub> H <sub>46</sub> O <sub>23</sub>              | 845.2342     | 845.2352       | -1.2        | 99.99     | 431.1199, 137.0250           |
| 12                             | Hydroxybenzoic acid hexoside-pentoside trimer       | 7.753    | C <sub>54</sub> H <sub>68</sub> O <sub>34</sub>              | 1259.3509    | 1259.3514      | -0.3        | 77.69     | 845.2329, 431.1147, 137.0228 |
| 13                             | Hydroxibenzoic acid derivative                      | 8.390    | C <sub>25</sub> H <sub>28</sub> O <sub>14</sub>              | 551.1398     | 551.1401       | -0.5        | 99.01     | 413.1053, 137.0256           |

|                                        |                                                            |        |                                                 |           |           |       |       |                              |
|----------------------------------------|------------------------------------------------------------|--------|-------------------------------------------------|-----------|-----------|-------|-------|------------------------------|
| 14                                     | Myricetin derivative                                       | 9.154  | C <sub>32</sub> H <sub>38</sub> O <sub>21</sub> | 757.1796  | 757.1827  | -4.1  | 43.77 | 316.0228                     |
| 15                                     | Quercetin-3-7-O-di-glucopyranoside                         | 9.342  | C <sub>27</sub> H <sub>30</sub> O <sub>17</sub> | 625.1426  | 625.1405  | 3.4   | 95.9  |                              |
| 16                                     | Quercetin-3-O-β-D-xylopyranosyl-(1/2)-rutinoside           | 10.018 | C <sub>32</sub> H <sub>38</sub> O <sub>20</sub> | 741.1866  | 741.1855  | -1.6  | 92.81 | 300.0274                     |
| 17                                     | Myricetin-O-methyl ether hexoside deoxy-hexoside pentoside | 10.064 | C <sub>33</sub> H <sub>40</sub> O <sub>21</sub> | 771.1972  | 771.1984  | -1.6  | 99.98 | 315.015                      |
| 18                                     | Kaempferol 3-O-lathyroside-7-O-α-L-rhamnopyranoside        | 10.699 | C <sub>32</sub> H <sub>38</sub> O <sub>19</sub> | 725.1915  | 725.1929  | -1.9  | 99.97 | 284.0333                     |
| 19                                     | Quercetin-3-O-rutinoside-7-O-α-L-rhamnopyranoside          | 10.823 | C <sub>33</sub> H <sub>40</sub> O <sub>20</sub> | 755.2009  | 755.2035  | -3.4  | 99.56 | 299.0200, 300.0274           |
| 20                                     | Lablab saponin                                             | 16.771 | C <sub>54</sub> H <sub>82</sub> O <sub>22</sub> | 1081.5216 | 1081.5219 | -0.3  | 99.93 |                              |
| 21                                     | Soyasaponin Bd                                             | 17.206 | C <sub>48</sub> H <sub>77</sub> O <sub>18</sub> | 941.5102  | 941.511   | -0.8  | 96.95 |                              |
| <b><i>Bound phenolic compounds</i></b> |                                                            |        |                                                 |           |           |       |       |                              |
| 1                                      | Gallic acid                                                | 1.275  | C <sub>7</sub> H <sub>6</sub> O <sub>5</sub>    | 169.0147  | 169.0137  | 1     | 99.28 | 125.0243                     |
| 2                                      | Protocatechuic acid                                        | 1.685  | C <sub>7</sub> H <sub>6</sub> O <sub>4</sub>    | 153.0198  | 153.0188  | 6.5   | 100   |                              |
| 3                                      | Dihydroxybenzoic acid hexoside                             | 2.131  | C <sub>13</sub> H <sub>16</sub> O <sub>9</sub>  | 315.0721  | 315.0716  | 1.6   | 99.56 | 217.0038, 152.0105, 108.0221 |
| 4                                      | Hydroxybenzoic acid hexoside-pentoside                     | 3.463  | C <sub>18</sub> H <sub>24</sub> O <sub>12</sub> | 431.1195  | 431.119   | 1.2   | 82.5  |                              |
| 5                                      | Morin                                                      | 3.956  | C <sub>15</sub> H <sub>10</sub> O <sub>7</sub>  | 301.0362  | 301.0402  | -13.3 | 99.08 |                              |
| 6                                      | Dihydroxybenzoic acid hexoside-pentoside I                 | 4.001  | C <sub>18</sub> H <sub>24</sub> O <sub>13</sub> | 447.1125  | 447.1139  | -3.1  | 78.66 |                              |
| 7                                      | Dihydrophaseic acid                                        | 6.120  | C <sub>15</sub> H <sub>22</sub> O <sub>5</sub>  | 281.1384  | 281.1389  | -1.8  | 95.61 | 217.0029                     |

---

|    |                                                                      |        |                                                 |          |          |      |       |          |
|----|----------------------------------------------------------------------|--------|-------------------------------------------------|----------|----------|------|-------|----------|
| 8  | Ferulic acid                                                         | 7.642  | C <sub>10</sub> H <sub>10</sub> O <sub>4</sub>  | 193.0494 | 193.0501 | -3.6 | 62.23 |          |
| 9  | Isoferulic acid                                                      | 8.291  | C <sub>10</sub> H <sub>10</sub> O <sub>4</sub>  | 193.0504 | 193.0501 | 1.6  | 84.77 |          |
| 10 | Myricetin-O-methyl<br>ether hexoside deoxy-<br>hexoside-pentoside    | 10.028 | C <sub>33</sub> H <sub>40</sub> O <sub>21</sub> | 771.1976 | 771.1984 | -1   | 59.56 | 315.015  |
| 11 | Kaempferol 3-O-<br>lathyroside-7-O- $\alpha$ -L-<br>rhamnopyranoside | 10.645 | C <sub>32</sub> H <sub>38</sub> O <sub>19</sub> | 725.1946 | 725.1929 | 2.3  | 99.31 | 284.0333 |
| 12 | Soyasaponin Ba                                                       | 16.031 | C <sub>48</sub> H <sub>76</sub> O <sub>19</sub> | 955.4886 | 955.4903 | -1.8 | 49.05 |          |
| 13 | Soyasaponin Bd                                                       | 17.190 | C <sub>48</sub> H <sub>78</sub> O <sub>18</sub> | 941.5096 | 941.5110 | -1.5 | 90.4  |          |

---
